# Supplementary material
Source: PubMed Central journal article supplement (PMC4388614)

Figure S1:

A

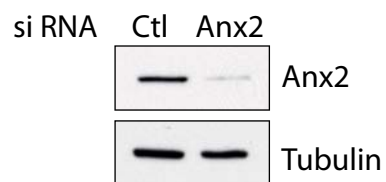

B

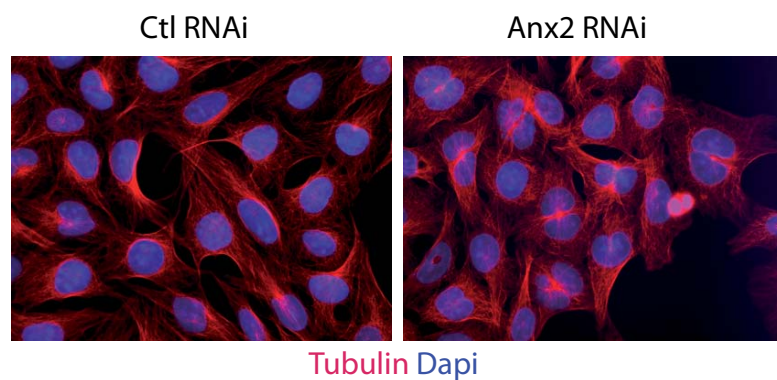

C

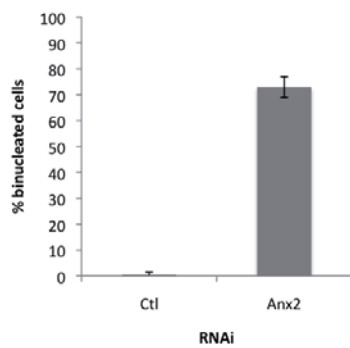

D

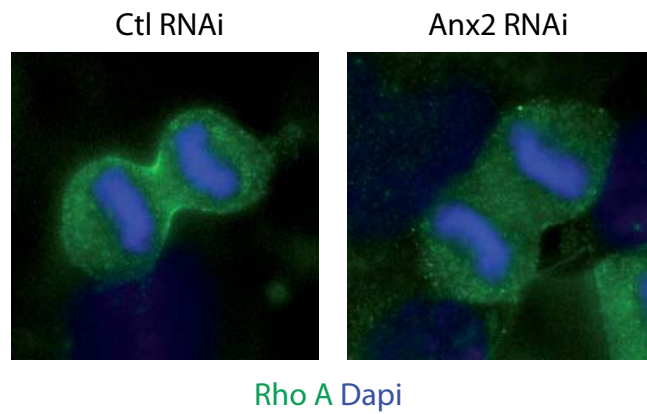

Supplement: embr0016-0481-sd1.pdf [file embr0016-0481-sd1.pdf]

Figure S2:

A

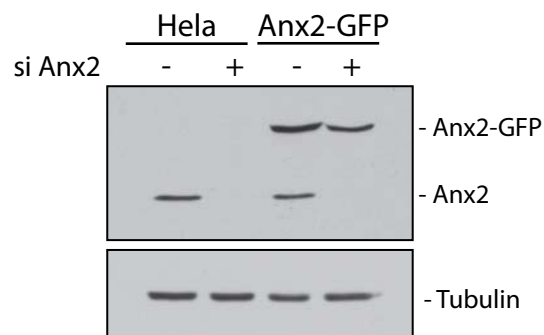

B

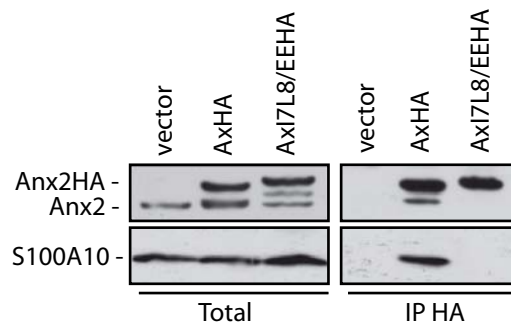

C

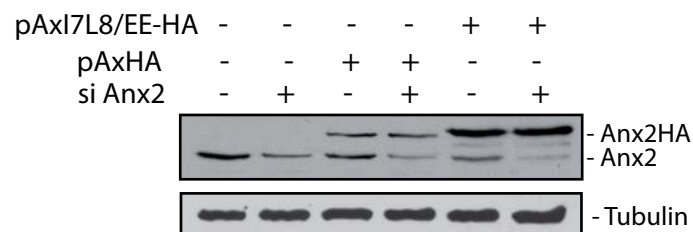

Supplement: embr0016-0481-sd2.pdf [file embr0016-0481-sd2.pdf]
